# Supplementary material for: Genome Sequence of the Freshwater Yangtze Finless Porpoise
Source: PubMed Central journal article supplement (PMC5924555; doi:10.3390/genes9040213), 2018-04-16
Supplement: genes-09-00213-s001.pdf [file genes-09-00213-s001.pdf]

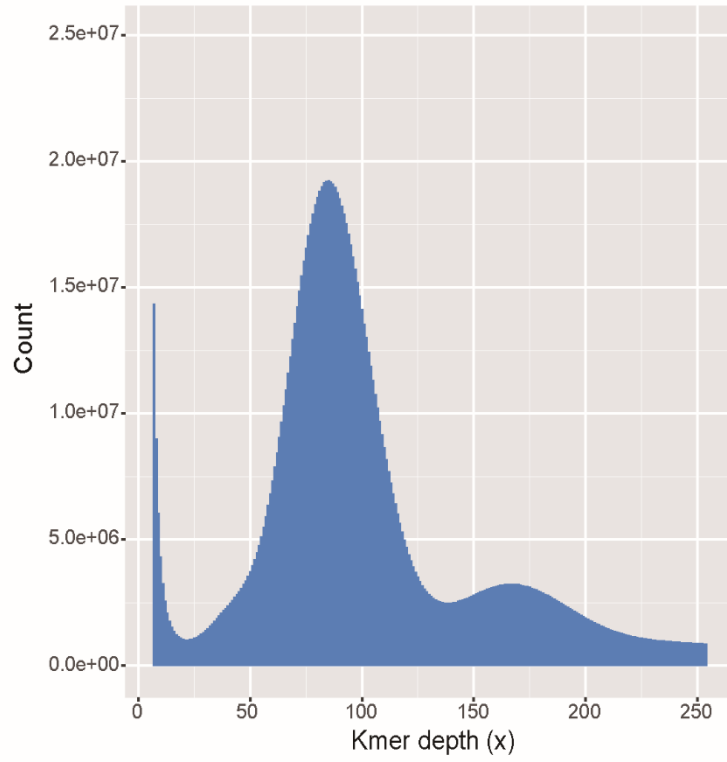

**Figure S1.** 17-mer distribution in the Yangtze finless porpoise genome. The x-axis is 17-mer depth (X); the y-axis is the number of sequencing reads at that depth.

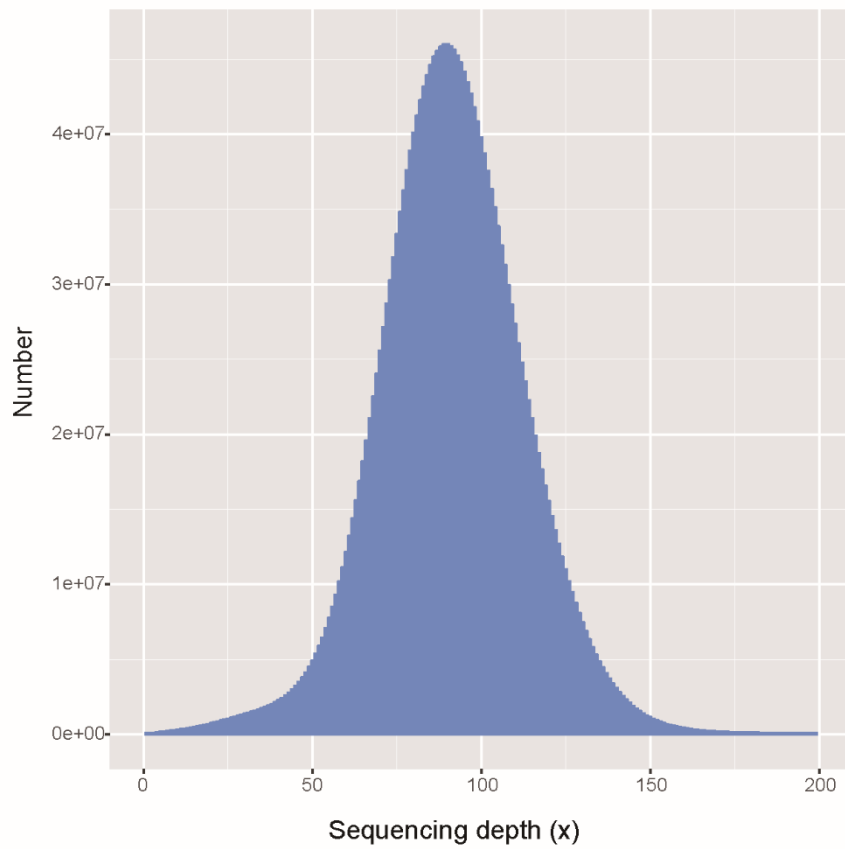

**Figure S2.** Sequence depth distribution of the assembly data. The x-axis shows the sequencing depth (X) and the y-axis shows the number of bases at a given depth. The results demonstrate that 99% of bases sequencing depth is more than 20.

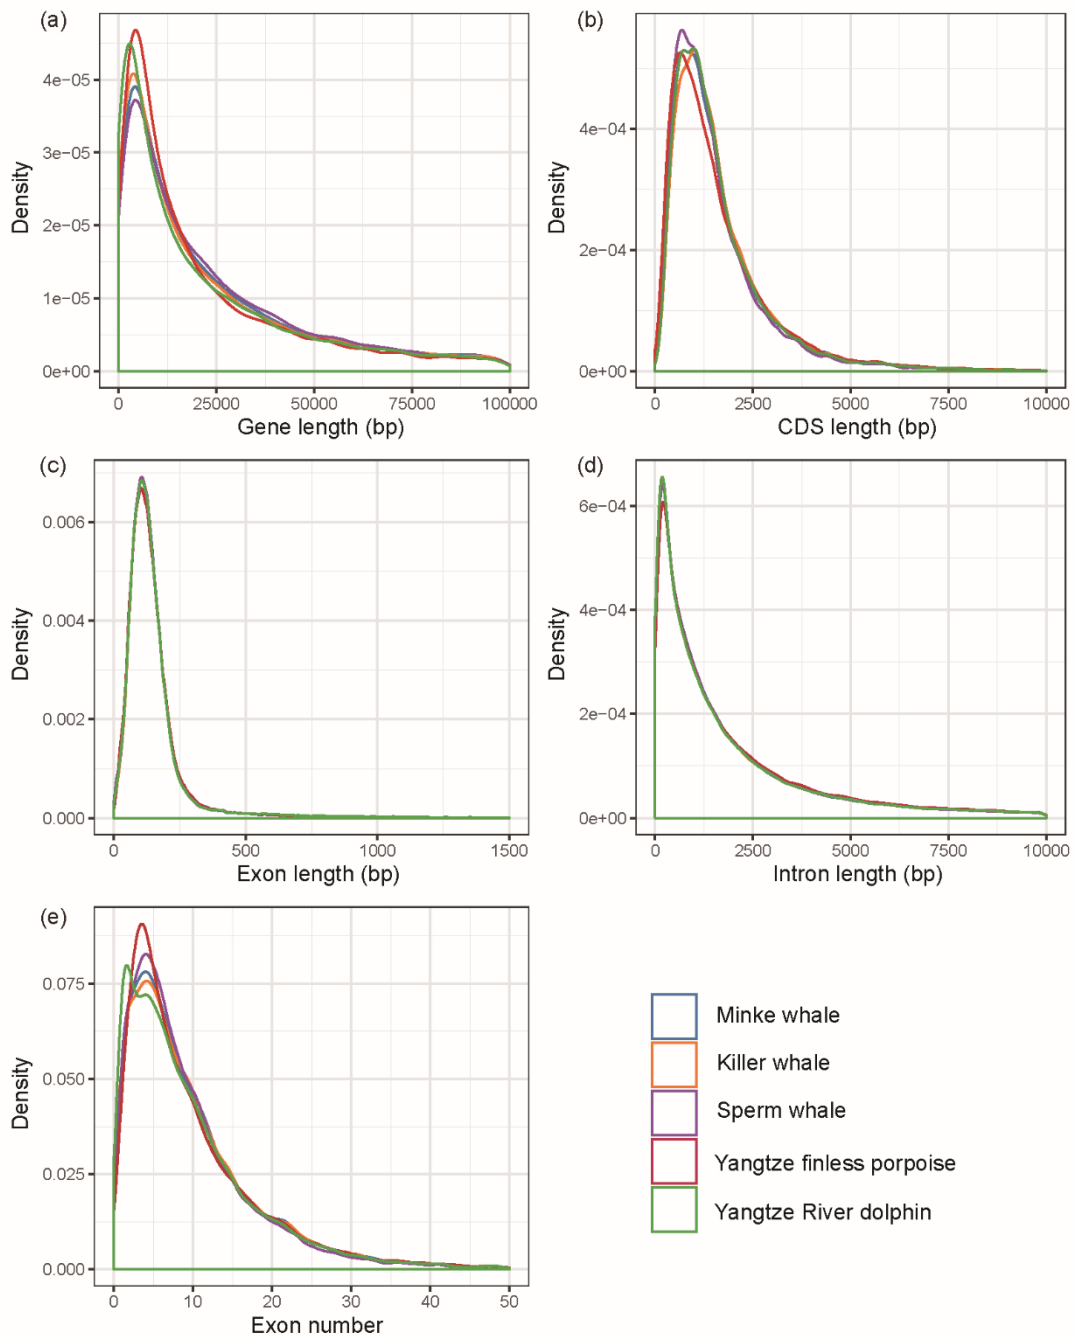

**Figure S3.** Comparison of gene structure characteristics of Yangtze finless porpoise and other cetaceans. The x-axis represents the length of corresponding genetic element of exon number and the y-axis represents gene density.

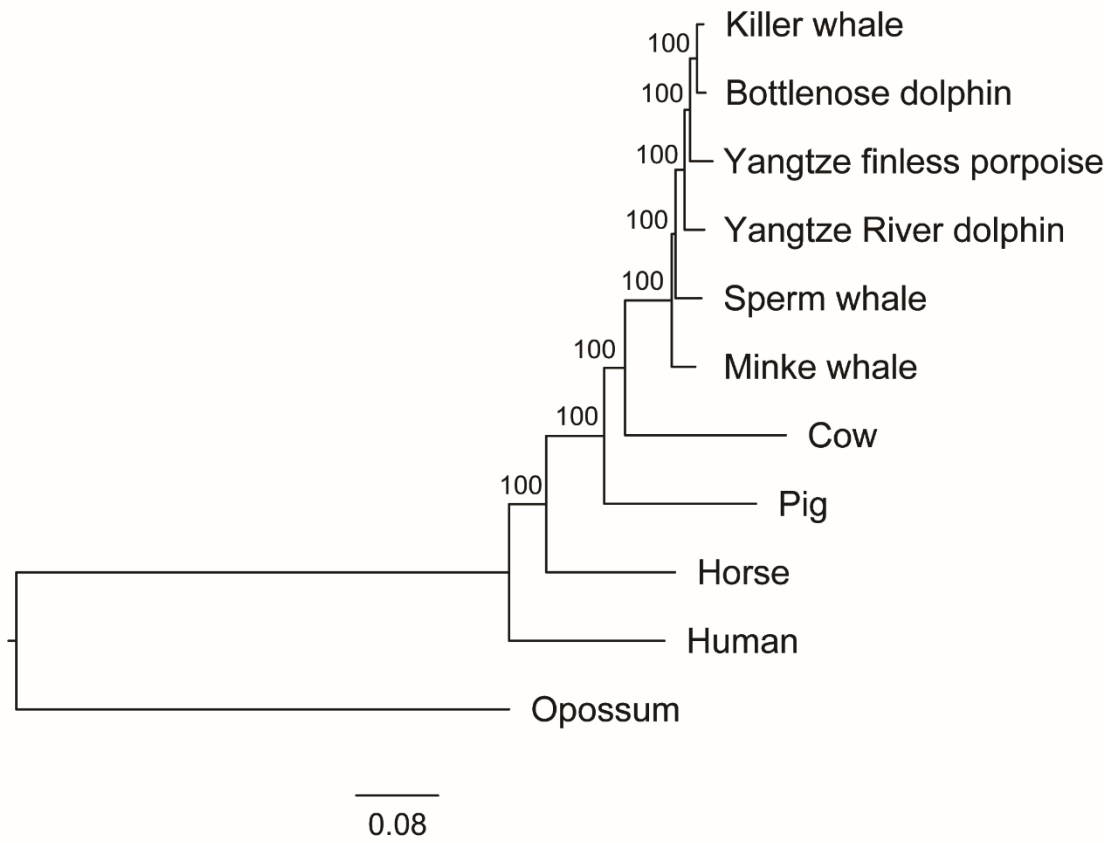

**Figure S4.** Phylogeny relationships between the Yangtze finless porpoise and other mammals reconstructed by RAxML with the GTR+G+I model.

**Table S1. Summary of sequenced reads**

| Library<br>Insert Size (bp) | Raw Reads             |                        |                                          |                                          | Qualified Reads <sup>1</sup> |                        |                                          |                                          | SRA<br>Number |
|-----------------------------|-----------------------|------------------------|------------------------------------------|------------------------------------------|------------------------------|------------------------|------------------------------------------|------------------------------------------|---------------|
|                             | Total<br>Data<br>(Gb) | Read<br>Length<br>(bp) | Sequence<br>Coverage <sup>2</sup><br>(×) | Physical<br>Coverage <sup>2</sup><br>(×) | Total<br>Data<br>(Gb)        | Read<br>Length<br>(bp) | Sequence<br>Coverage <sup>2</sup><br>(×) | Physical<br>Coverage <sup>2</sup><br>(×) |               |
| 289                         | 58.94                 | 150.00                 | 23.67                                    | 22.80                                    | 57.84                        | 149.75                 | 23.23                                    | 22.41                                    | SRR6923836    |
| 462                         | 71.33                 | 150.00                 | 28.65                                    | 44.12                                    | 70.12                        | 149.74                 | 28.16                                    | 43.44                                    | SRR6923837    |
| 624                         | 67.47                 | 150.00                 | 27.10                                    | 56.36                                    | 63.90                        | 149.67                 | 25.66                                    | 53.50                                    | SRR6923834    |
| 791                         | 57.58                 | 150.00                 | 23.12                                    | 60.97                                    | 55.39                        | 149.67                 | 22.24                                    | 58.78                                    | SRR6923835    |
| 4,000                       | 108.73                | 150.00                 | 43.67                                    | 582.22                                   | 70.74                        | 150.00                 | 28.41                                    | 378.80                                   | SRR6923832    |
| 7,000                       | 115.4                 | 150.00                 | 46.35                                    | 1,081.39                                 | 84.76                        | 150.00                 | 34.04                                    | 794.27                                   | SRR6923833    |
| 11,000                      | 107.37                | 150.00                 | 43.12                                    | 1,581.08                                 | 79.78                        | 150.00                 | 32.04                                    | 1,174.81                                 | SRR6923830    |
| 18,000                      | 127.46                | 150.00                 | 51.19                                    | 3,071.33                                 | 97.75                        | 150.00                 | 39.26                                    | 2,355.42                                 | SRR6923831    |
| <b>Total</b>                | <b>714.28</b>         | <b>-</b>               | <b>286.87</b>                            | <b>6,500.27</b>                          | <b>580.28</b>                | <b>-</b>               | <b>233.04</b>                            | <b>4,881.43</b>                          | <b>-</b>      |

<sup>1</sup>Raw reads in mate-paired libraries were filtered to remove duplicates and reads with low quality and/or adapter contamination, raw reads in paired-end libraries were filtered in the same manner then subjected to k-mer-based correction.

<sup>2</sup>Coverage was calculated using an estimated Yangtze finless porpoise genome size of 2.5 Gb. Sequence coverage refers to the total length of generated reads, and physical coverage refers to the total cloned DNA used for the paired reads.

**Table S2. 17-mer depth distribution.**

| <b>K-mer value</b> | <b>K-mer_Num</b> | <b>Peak_Depth</b> | <b>Genome Size</b> | <b>Used Bases</b> | <b>Used Reads</b> | <b>Depth(x)</b> |
|--------------------|------------------|-------------------|--------------------|-------------------|-------------------|-----------------|
| 17                 | 211,733,348,694  | 85                | 2,490,980,572      | 240,621,642,121   | 1,616,373,163     | 95.24           |

**Table S3. Statistics for the final assemblies of the Yangtze finless porpoise genome**

|                       | <b>Contig</b>    |               | <b>Scaffold</b>  |               |
|-----------------------|------------------|---------------|------------------|---------------|
|                       | <b>Size (bp)</b> | <b>Number</b> | <b>Size (bp)</b> | <b>Number</b> |
| <b>N90</b>            | 13,158           | 49,727        | 405,799          | 1,478         |
| <b>N80</b>            | 21,552           | 36,306        | 692,029          | 1,042         |
| <b>N70</b>            | 29,550           | 27,239        | 996,516          | 763           |
| <b>N60</b>            | 37,733           | 20,364        | 1,337,316        | 562           |
| <b>N50</b>            | 46,692           | 14,892        | 1,704,448        | 407           |
| <b>Longest</b>        |                  | 367,721       |                  | 8,041,833     |
| <b>Total Size</b>     |                  | 2,297,280,777 |                  | 2,324,302,892 |
| <b>Average length</b> |                  | 21,911.42     |                  | 95,897.00     |

**Table S4. Summary of BUSCO analysis of matches to the 4,104 mammalian BUSCOs**

|                                        | <b>Count</b> | <b>Ratio</b> |
|----------------------------------------|--------------|--------------|
| <b>Complete BUSCOs</b>                 | 3,838        | 93.60%       |
| <b>Complete and single-copy BUSCOs</b> | 3,807        | 92.80%       |
| <b>Complete and duplicated BUSCOs</b>  | 31           | 0.80%        |
| <b>Fragmented BUSCOs</b>               | 132          | 3.20%        |
| <b>Missing BUSCOs</b>                  | 165          | 4.10%        |



**Table S5. Prediction of repetitive elements in the assembled Yangtze finless porpoise genome**

| Type              | Repeat Size (bp)   | % of genome  |
|-------------------|--------------------|--------------|
| TRF               | 36,679,712         | 1.65         |
| RepeatMasker      | 41,255,099         | 1.86         |
| RepeatProteinMask | 285,727,584        | 12.87        |
| De novo           | 824,692,743        | 37.15        |
| <b>Total</b>      | <b>887,629,810</b> | <b>39.98</b> |

**Table S6. Summary statistics of interspersed repeat regions**

| Type           | Rebase TEs  |             | TE proteins |             | De novo     |             | Combined TEs |             |
|----------------|-------------|-------------|-------------|-------------|-------------|-------------|--------------|-------------|
|                | Length (bp) | % in genome | Length (bp) | % in genome | Length (bp) | % in genome | Length (bp)  | % in genome |
| <b>DNA</b>     | 13,030,245  | 0.59        | 5,742,922   | 0.26        | 58,599,942  | 2.64        | 70,751,802   | 3.19        |
| <b>LINE</b>    | 14,122,460  | 0.64        | 274,740,639 | 12.38       | 551,867,994 | 24.86       | 607,756,082  | 27.38       |
| <b>SINE</b>    | 5,488       | 0.00        | 0           | 0           | 106,612,802 | 4.80        | 106,617,381  | 4.80        |
| <b>LTR</b>     | 2,395,432   | 0.11        | 5,257,279   | 0.24        | 90,096,068  | 4.06        | 94,925,729   | 4.28        |
| <b>Other</b>   | 14,148,952  | 0.64        | 699         | 0.00        | 27,594,115  | 1.24        | 37,361,001   | 1.68        |
| <b>Unknown</b> | 362,336     | 0.02        | 0           | 0           | 3,922,485   | 0.18        | 4,284,821    | 0.19        |
| <b>Total</b>   | 41,255,099  | 1.86        | 285,727,584 | 12.87       | 824,692,743 | 37.15       | 850,996,764  | 38.33       |

**Table S7. Data on all species used during the genome analysis**

| <b>Species</b>               | <b>Latin name</b>          | <b>Version</b>               | <b>Source</b> |
|------------------------------|----------------------------|------------------------------|---------------|
| <b>Cow</b>                   | Bos taurus                 | UMD_3.1.1                    | Ensembl       |
| <b>Pig</b>                   | Sus scrofa                 | Sscrofa10.2                  | Ensembl       |
| <b>Opossum</b>               | Monodelphis domestica      | MonDom5                      | Ensembl       |
| <b>Horse</b>                 | Equus caballus             | EquCab2                      | Ensembl       |
| <b>Human</b>                 | Homo sapiens               | GRCh38                       | Ensembl       |
| <b>Yangtze River dolphin</b> | Lipotes vexillifer         | Lipotes_vexillifer_v1        | NCBI          |
| <b>Bottlenose dolphin</b>    | Tursiops truncatus         | NIST Tur_tru v1              | NCBI          |
| <b>Killer whale</b>          | Orcinus orca               | Oorc_1.1                     | NCBI          |
| <b>Common minke whale</b>    | Balaenoptera acutorostrata | BalAcu1.0                    | NCBI          |
| <b>Sperm whale</b>           | Physeter catodon           | Physeter_macrocephalus-2.0.2 | NCBI          |

**Table S8. Prediction of protein-coding genes in the Yangtze finless porpoise**

| Gene set         |                          | Total<br>Genes<br>Predicted | Average<br>Gene<br>Length(bp) | Average<br>CDS<br>Length(bp) | Average<br>Exon per<br>Gene | Average<br>Exon<br>Length(bp) | Average<br>Intron<br>Length(bp) |
|------------------|--------------------------|-----------------------------|-------------------------------|------------------------------|-----------------------------|-------------------------------|---------------------------------|
| <b>De novo</b>   | Augustus                 | 37,303                      | 28,264.61                     | 921.47                       | 6.25                        | 147.40                        | 5,738.43                        |
|                  | GlimmerHMM               | 85,860                      | 6,800.71                      | 489.92                       | 3.44                        | 142.38                        | 2,728.15                        |
|                  | Geneid                   | 134,560                     | 9,110.22                      | 526.35                       | 4.11                        | 128.03                        | 2,876.60                        |
|                  | Cow                      | 27695.00                    | 29558.89                      | 1287.05                      | 6.87                        | 187.29                        | 8,717.24                        |
|                  | Killer whale             | 26942.00                    | 32091.07                      | 1356.77                      | 7.37                        | 184.21                        | 7,706.16                        |
| <b>Homolog</b>   | Sperm whale              | 26836.00                    | 26501.65                      | 1271.89                      | 7.04                        | 180.71                        | 7,912.74                        |
|                  | Common<br>minke whale    | 26332.00                    | 30653.48                      | 1318.68                      | 7.35                        | 179.52                        | 7,995.26                        |
|                  | Yangtze River<br>dolphin | 26007.00                    | 31493.15                      | 1344.52                      | 7.37                        | 182.39                        | 7,865.01                        |
|                  | Bottlenose<br>dolphin    | 24622.00                    | 31536.45                      | 1266.24                      | 6.79                        | 186.47                        | 8,077.46                        |
| <b>Final set</b> | -                        | 18479                       | 36929.68                      | 1687.41                      | 10.17                       | 165.89                        | 3,842.38                        |

**Table S9. Summary statistics of comparative gene structure**

| <b>Gene set</b>                     | <b>Numbers</b> | <b>Average<br/>Gene Length<br/>(bp)</b> | <b>Average CDS<br/>Length<br/>(bp)</b> | <b>Average<br/>Exons per<br/>Gene</b> | <b>Average<br/>Exon Length<br/>(bp)</b> | <b>Average<br/>Intron<br/>Length<br/>(bp)</b> |
|-------------------------------------|----------------|-----------------------------------------|----------------------------------------|---------------------------------------|-----------------------------------------|-----------------------------------------------|
| <b>Yangtze finless<br/>porpoise</b> | 18,479         | 36,929.68                               | 1,687.41                               | 10.17                                 | 165.89                                  | 3,842.38                                      |
| <b>Yangtze river<br/>dolphin</b>    | 18,877         | 45,085.80                               | 1,697.09                               | 9.92                                  | 180.00                                  | 4,613.82                                      |
| <b>Killer whale</b>                 | 18,129         | 51,256.47                               | 1,749.02                               | 10.30                                 | 169.76                                  | 4,949.68                                      |
| <b>Sperm whale</b>                  | 18,626         | 37,852.40                               | 1,603.08                               | 9.67                                  | 165.74                                  | 3,794.73                                      |
| <b>Common<br/>minke whale</b>       | 18,400         | 50,781.71                               | 1,697.13                               | 10.28                                 | 165.10                                  | 4,702.13                                      |

**Table S10. Summary of the predicted pseudogenes**

| <b>Type</b>                                           | <b>Numbers</b> | <b>% of genome</b> |
|-------------------------------------------------------|----------------|--------------------|
| <b>Frame-shifted genes</b>                            | 2373           | 93.79              |
| <b>Prematurely terminated genes</b>                   | 2131           | 84.23              |
| <b>Frame-shifted and prematurely terminated genes</b> | 1974           | 78.02              |
| <b>Total</b>                                          | 2530           | 100                |

**Table S11. Functional annotation of predicted genes in the Yangtze finless porpoise genome**

|                    | <b>Database</b> | <b>Number</b> | <b>% of genome</b> |
|--------------------|-----------------|---------------|--------------------|
| <b>Total</b>       |                 | 18,479        | 100                |
|                    | InterPro        | 17,507        | 94.74              |
|                    | GO              | 11,997        | 64.92              |
| <b>Annotated</b>   | Swiss-Prot      | 15,807        | 85.54              |
|                    | TrEMBL          | 15,970        | 86.42              |
|                    | KEGG            | 8,529         | 46.16              |
| <b>Unannotated</b> |                 | 102           | 0.55               |

**Table S12. Summary statistics of gene families in 11 species**

| <b>Species</b>                  | <b>Total genes</b> | <b>Genes in families</b> | <b>Non-clustered genes</b> | <b>Families</b> | <b>Unique families</b> | <b>Genes per family</b> | <b>Maximum gene family size</b> |
|---------------------------------|--------------------|--------------------------|----------------------------|-----------------|------------------------|-------------------------|---------------------------------|
| <b>Cow</b>                      | 19,981             | 18,197                   | 1,784                      | 17,157          | 114                    | 1.06                    | 15                              |
| <b>Pig</b>                      | 22,410             | 18,891                   | 3,519                      | 17,512          | 179                    | 1.08                    | 21                              |
| <b>Human</b>                    | 22,813             | 21,385                   | 1,428                      | 17,781          | 383                    | 1.20                    | 18                              |
| <b>Opossum</b>                  | 21,313             | 14,262                   | 7,051                      | 12,248          | 479                    | 1.16                    | 27                              |
| <b>Horse</b>                    | 20,431             | 17,884                   | 2,547                      | 16,700          | 192                    | 1.07                    | 18                              |
| <b>Yangtze finless porpoise</b> | 18,479             | 14,072                   | 4,407                      | 13,911          | 44                     | 1.01                    | 5                               |
| <b>Yangtze River dolphin</b>    | 17,905             | 16,626                   | 1,279                      | 16,187          | 159                    | 1.03                    | 12                              |
| <b>Common minke whale</b>       | 17,525             | 16,340                   | 1,185                      | 16,071          | 25                     | 1.02                    | 8                               |
| <b>Killer whale</b>             | 17,283             | 16,658                   | 625                        | 16,493          | 5                      | 1.01                    | 4                               |
| <b>Sperm whale</b>              | 17,579             | 15,621                   | 1,958                      | 15,425          | 6                      | 1.01                    | 5                               |
| <b>Bottlenose dolphin</b>       | 16,531             | 13,400                   | 3,131                      | 13,337          | 6                      | 1.00                    | 7                               |



**Table S13. GO enrichment analysis of the unique gene families in the Yangtze finless porpoise lineage**

| <b>GO</b>  | <b>Type</b>        | <b>Function</b>                                      | <b>Adjust P-value</b> |
|------------|--------------------|------------------------------------------------------|-----------------------|
| GO:0001518 | Cellular component | voltage-gated sodium channel complex                 | 0.012289              |
| GO:0005248 | Molecular function | voltage-gated sodium channel activity                | 0.012437              |
| GO:0005272 | Molecular function | sodium channel activity                              | 0.016213              |
| GO:0005787 | Cellular component | signal peptidase complex                             | 0.008365              |
| GO:0015081 | Molecular function | sodium ion transmembrane transporter activity        | 0.021554              |
| GO:0034706 | Cellular component | sodium channel complex                               | 0.012289              |
| GO:0071205 | Biological process | protein localization to juxtaparanode region of axon | 0.008439              |
| GO:0099612 | Biological process | protein localization to axon                         | 0.008439              |

**Table S14. GO enrichment analysis of the expanded gene families in the Yangtze finless porpoise lineage**

| <b>GO</b>  | <b>Type</b>        | <b>Function</b>                                                 | <b>Adjust P-value</b> |
|------------|--------------------|-----------------------------------------------------------------|-----------------------|
| GO:0006325 | biological process | chromatin organization                                          | 0.000391              |
| GO:0007155 | biological process | cell adhesion                                                   | 0.002884              |
| GO:0007156 | biological process | homophilic cell adhesion via plasma membrane adhesion molecules | 9.82E-09              |
| GO:0016192 | biological process | vesicle-mediated transport                                      | 0.012336              |
| GO:0016337 | biological process | single organismal cell-cell adhesion                            | 4.41E-07              |
| GO:0022610 | biological process | biological adhesion                                             | 0.002884              |
| GO:0051276 | biological process | chromosome organization                                         | 0.005419              |
| GO:0000786 | cellular component | nucleosome                                                      | 9.82E-09              |
| GO:0005576 | cellular component | extracellular region                                            | 0.049732              |
| GO:0005622 | cellular component | intracellular                                                   | 0.000606              |
| GO:0005886 | cellular component | plasma membrane                                                 | 8.76E-07              |
| GO:0032993 | cellular component | protein-DNA complex                                             | 1.21E-08              |
| GO:0044427 | cellular component | chromosomal part                                                | 1.74E-08              |
| GO:0003779 | molecular function | actin binding                                                   | 0.002109              |
| GO:0005488 | molecular function | binding                                                         | 0.010055              |
| GO:0005509 | molecular function | calcium ion binding                                             | 6.45E-07              |
| GO:0005515 | molecular function | protein binding                                                 | 0.005586              |
| GO:0046982 | molecular function | protein heterodimerization activity                             | 4.05E-05              |
| GO:0046983 | molecular function | protein dimerization activity                                   | 0.048739              |

**Table S15. Candidate PSGs in the Yangtze finless porpoise lineage.**

| <b>GeneID</b> | <b>Common name</b> | <b>Description</b>                                                     |
|---------------|--------------------|------------------------------------------------------------------------|
| nas20645      | NEXN               | nexilin F-actin binding protein                                        |
| nas02916      | NA                 | NA                                                                     |
| nas23431      | XYLT2              | xylosyltransferase 2                                                   |
| nas16008      | STK11IP            | serine/threonine kinase 11 interacting protein                         |
| nas05569      | TNFRSF11B          | TNF receptor superfamily member 11b                                    |
| nas00047      | NA                 | NA                                                                     |
| nas11931      | SUSD3              | sushi domain containing 3                                              |
| nas03498      | PROKR1             | prokineticin receptor 1                                                |
| nas03109      | PNLIP              | pancreatic lipase                                                      |
| nas07571      | CCDC40             | coiled-coil domain containing 40                                       |
| nas00173      | LRR3B              | leucine rich repeat containing 3B                                      |
| nas08339      | CATSPER4           | cation channel sperm associated 4                                      |
| nas16933      | KIF2C              | kinesin family member 2C                                               |
| nas11807      | ANXA5              | annexin A5                                                             |
| nas06894      | MRPS16             | mitochondrial ribosomal protein S16                                    |
| nas06377      | FANCL              | Fanconi anemia complementation group L                                 |
| nas12209      | TAF1D              | TATA-box binding protein associated factor, RNA polymerase I subunit D |
| nas01941      | EFHB               | EF-hand domain family member B                                         |
| nas06520      | ELANE              | elastase, neutrophil expressed                                         |
| nas12470      | DDX43              | DEAD-box helicase 43                                                   |
| nas00446      | SLC35E4            | solute carrier family 35 member E4                                     |
| nas25099      | VSX1               | visual system homeobox 1                                               |
| nas14990      | EPB41L5            | erythrocyte membrane protein band 4.1 like 5                           |
| nas17486      | RASGEF1B           | RasGEF domain family member 1B                                         |
| nas12726      | OGFR               | opioid growth factor receptor                                          |
| nas23659      | DENND4C            | DENN domain containing 4C                                              |
| nas05407      | ECSIT              | ECSIT signalling integrator                                            |
| nas23555      | VSIG8              | V-set and immunoglobulin domain containing 8                           |
| nas24488      | EXOC2              | exocyst complex component 2                                            |
| nas06483      | NA                 | NA                                                                     |
| nas18892      | STAG2              | stromal antigen 2                                                      |
| nas04427      | SLC9A8             | solute carrier family 9 member A8                                      |
| nas14634      | KTN1               | kinectin 1                                                             |
| nas11914      | LRRCC1             | leucine rich repeat and coiled-coil centrosomal protein 1              |
| nas09087      | SPINK5             | serine peptidase inhibitor, Kazal type 5                               |
| nas21102      | PLA2G4D            | phospholipase A2 group IVD                                             |
| nas02847      | IL4                | interleukin 4                                                          |
| nas10153      | RARRES2            | retinoic acid receptor responder 2                                     |
| nas14533      | RGCC               | regulator of cell cycle                                                |
| nas21249      | NA                 | NA                                                                     |

---

|          |         |                                                             |
|----------|---------|-------------------------------------------------------------|
| nas21253 | BCL7B   | BCL tumor suppressor 7B                                     |
| nas23250 | CHMP4C  | charged multivesicular body protein 4C                      |
| nas06877 | KRT85   | keratin 85                                                  |
| nas12651 | GPR37   | G protein-coupled receptor 37                               |
| nas02770 | RAD17   | RAD17 checkpoint clamp loader component                     |
| nas14796 | ERAP2   | endoplasmic reticulum aminopeptidase 2                      |
| nas21908 | LPXN    | leupaxin                                                    |
| nas17556 | NA      | NA                                                          |
| nas15084 | EIF2B5  | eukaryotic translation initiation factor 2B subunit epsilon |
| nas17645 | NOC2L   | NOC2 like nucleolar associated transcriptional repressor    |
| nas17643 | PLEKHN1 | pleckstrin homology domain containing N1                    |
| nas08416 | TEX9    | testis expressed 9                                          |
| nas00929 | NA      | NA                                                          |
| nas02338 | FAM71B  | family with sequence similarity 71 member B                 |
| nas23647 | NA      | NA                                                          |
| nas13737 | SLC15A1 | solute carrier family 15 member 1                           |
| nas09917 | VPS16   | VPS16, CORVET/HOPS core subunit                             |
| nas18950 | PTPN14  | protein tyrosine phosphatase, non-receptor type 14          |
| nas18898 | RHAG    | Rh-associated glycoprotein                                  |
| nas16263 | CACNA1E | calcium voltage-gated channel subunit alpha 1 E             |
| nas23642 | CRYL1   | crystallin lambda 1                                         |
| nas01898 | RTBDN   | retbindin                                                   |
| nas23373 | GUCA2B  | guanylate cyclase activator 2B                              |
| nas16726 | SLC19A1 | solute carrier family 19 member 1                           |
| nas07560 | C1QTNF1 | C1q and TNF related 1                                       |
| nas14162 | ZMYND8  | zinc finger MYND-type containing 8                          |
| nas17483 | BMP3    | bone morphogenetic protein 3                                |
| nas13021 | BLZF1   | basic leucine zipper nuclear factor 1                       |
| nas14440 | LIPN    | lipase family member N                                      |
| nas15025 | BLCAP   | bladder cancer associated protein                           |
| nas20965 | GTSE1   | G2 and S-phase expressed 1                                  |
| nas00787 | ARMCX5  | armadillo repeat containing, X-linked 5                     |
| nas02736 | VIP     | vasoactive intestinal peptide                               |
| nas08359 | NA      | NA                                                          |
| nas20041 | C1QL4   | complement C1q like 4                                       |
| nas16311 | AKIP1   | A-kinase interacting protein 1                              |
| nas24631 | TBX21   | T-box 21                                                    |
| nas09814 | FAM214A | family with sequence similarity 214 member A                |
| nas24863 | CLRN3   | clarin 3                                                    |
| nas10471 | UBXN2B  | UBX domain protein 2B                                       |
| nas04036 | KDELR2  | KDEL endoplasmic reticulum protein retention receptor 2     |
| nas14981 | PHKA2   | phosphorylase kinase regulatory subunit alpha 2             |
| nas00035 | ADGRG2  | adhesion G protein-coupled receptor G2                      |
| nas08813 | RAD18   | RAD18, E3 ubiquitin protein ligase                          |

---

---

|          |         |                                                                                                      |
|----------|---------|------------------------------------------------------------------------------------------------------|
| nas22738 | LTN1    | listerin E3 ubiquitin protein ligase 1                                                               |
| nas13389 | CRTC3   | CREB regulated transcription coactivator 3                                                           |
| nas03431 | TRIT1   | tRNA isopentenyltransferase 1                                                                        |
| nas12711 | ATP5A1  | ATP synthase, H <sup>+</sup> transporting, mitochondrial F1 complex, alpha subunit 1, cardiac muscle |
| nas00078 | TMEM214 | transmembrane protein 214                                                                            |
| nas02273 | BTBD16  | BTB domain containing 16                                                                             |
| nas16279 | PLAA    | phospholipase A2 activating protein                                                                  |
| nas06924 | TBC1D31 | TBC1 domain family member 31                                                                         |
| nas23980 | CFAP43  | cilia and flagella associated protein 43                                                             |
| nas15028 | SRC     | SRC proto-oncogene, non-receptor tyrosine kinase                                                     |
| nas06412 | FAN1    | FANCD2 and FANCI associated nuclease 1                                                               |
| nas17320 | CLEC7A  | C-type lectin domain containing 7A                                                                   |
| nas00840 | SLCO2B1 | solute carrier organic anion transporter family member 2B1                                           |
| nas24601 | GIP     | gastric inhibitory polypeptide                                                                       |
| nas05360 | ARMC6   | armadillo repeat containing 6                                                                        |
| nas24309 | FCRL5   | Fc receptor like 5                                                                                   |
| nas13752 | TIAM2   | T-cell lymphoma invasion and metastasis 2                                                            |
| nas13755 | NOX3    | NADPH oxidase 3                                                                                      |
| nas06526 | NFKBIZ  | NFKB inhibitor zeta                                                                                  |
| nas01885 | STX10   | syntaxin 10                                                                                          |
| nas21060 | NA      | NA                                                                                                   |
| nas24642 | PSMB3   | proteasome subunit beta 3                                                                            |
| nas25017 | CCDC175 | coiled-coil domain containing 175                                                                    |
| nas04180 | SKAP2   | src kinase associated phosphoprotein 2                                                               |
| nas13023 | DSC2    | desmocollin 2                                                                                        |
| nas00497 | HEATR5B | HEAT repeat containing 5B                                                                            |
| nas00495 | EIF2AK2 | eukaryotic translation initiation factor 2 alpha kinase 2                                            |
| nas21622 | HEMK1   | HemK methyltransferase family member 1                                                               |
| nas17200 | PHF1    | PHD finger protein 1                                                                                 |
| nas24574 | AARS2   | alanyl-tRNA synthetase 2, mitochondrial                                                              |
| nas15423 | WASF3   | WAS protein family member 3                                                                          |
| nas11540 | CMPK2   | cytidine/uridine monophosphate kinase 2                                                              |
| nas05284 | BFSP1   | beaded filament structural protein 1                                                                 |
| nas07161 | HMOX1   | heme oxygenase 1                                                                                     |
| nas02501 | SS18    | SS18, nBAF chromatin remodeling complex subunit                                                      |
| nas04387 | CCDC138 | coiled-coil domain containing 138                                                                    |
| nas03644 | TTC29   | tetratricopeptide repeat domain 29                                                                   |
| nas05211 | EFCAB7  | EF-hand calcium binding domain 7                                                                     |
| nas09873 | THEMIS2 | thymocyte selection associated family member 2                                                       |
| nas02725 | NPY     | neuropeptide Y                                                                                       |
| nas11758 | RIPPLY1 | rippy transcriptional repressor 1                                                                    |
| nas08797 | IL17RC  | interleukin 17 receptor C                                                                            |

---

---

|          |          |                                                          |
|----------|----------|----------------------------------------------------------|
| nas08790 | BRK1     | BRICK1, SCAR/WAVE actin nucleating complex subunit       |
| nas05020 | NA       | NA                                                       |
| nas22824 | MRAP     | melanocortin 2 receptor accessory protein                |
| nas11266 | LUZP1    | leucine zipper protein 1                                 |
| nas17864 | NA       | NA                                                       |
| nas17760 | CASP10   | caspase 10                                               |
| nas14017 | DENND1C  | DENN domain containing 1C                                |
| nas22183 | OPN4     | opsin 4                                                  |
| nas13387 | FURIN    | furin, paired basic amino acid cleaving enzyme           |
| nas21340 | COX4I2   | cytochrome c oxidase subunit 4I2                         |
| nas13635 | NECTIN2  | nectin cell adhesion molecule 2                          |
| nas05854 | C16orf46 | chromosome 16 open reading frame 46                      |
| nas23355 | FAM183A  | family with sequence similarity 183 member A             |
| nas14724 | GABRA3   | gamma-aminobutyric acid type A receptor alpha3 subunit   |
| nas12913 | COIL     | coilin                                                   |
| nas22178 | SNCG     | synuclein gamma                                          |
| nas04138 | BRCC3    | BRCA1/BRCA2-containing complex subunit 3                 |
| nas17850 | RPL18    | ribosomal protein L18                                    |
| nas13823 | IKZF3    | IKAROS family zinc finger 3                              |
| nas19386 | POU2F2   | POU class 2 homeobox 2                                   |
| nas08114 | OS9      | OS9, endoplasmic reticulum lectin                        |
| nas21262 | CLDN3    | claudin 3                                                |
| nas24907 | CFAP20   | cilia and flagella associated protein 20                 |
| nas24604 | CALCOCO2 | calcium binding and coiled-coil domain 2                 |
| nas22293 | PTPRC    | protein tyrosine phosphatase, receptor type C            |
| nas11780 | ZBTB37   | zinc finger and BTB domain containing 37                 |
| nas18336 | SNIP1    | Smad nuclear interacting protein 1                       |
| nas15225 | TIFA     | TRAF interacting protein with forkhead associated domain |
| nas23493 | ALOX12   | arachidonate 12-lipoxygenase, 12S type                   |
| nas18773 | PHACTR2  | phosphatase and actin regulator 2                        |
| nas07059 | SOX13    | SRY-box 13                                               |
| nas22511 | TSGA10IP | testis specific 10 interacting protein                   |
| nas12563 | NA       | NA                                                       |
| nas10397 | SLC6A13  | solute carrier family 6 member 13                        |
| nas22457 | MAP4K2   | mitogen-activated protein kinase kinase kinase kinase 2  |
| nas20120 | C7orf61  | chromosome 7 open reading frame 61                       |
| nas22459 | CDC42BPG | CDC42 binding protein kinase gamma                       |
| nas09242 | C6orf163 | chromosome 6 open reading frame 163                      |
| nas10521 | SFTPB    | surfactant protein B                                     |
| nas06033 | COA1     | cytochrome c oxidase assembly factor 1 homolog           |
| nas21046 | TOMM40L  | translocase of outer mitochondrial membrane 40 like      |
| nas00137 | PTGFR    | prostaglandin F receptor                                 |
| nas14104 | TRIM21   | tripartite motif containing 21                           |

---

---

|          |           |                                                                     |
|----------|-----------|---------------------------------------------------------------------|
| nas12278 | HPS4      | HPS4, biogenesis of lysosomal organelles complex 3 subunit 2        |
| nas00327 | FANCE     | Fanconi anemia complementation group E                              |
| nas21158 | TCL1A     | T-cell leukemia/lymphoma 1A                                         |
| nas05392 | SPC24     | SPC24, NDC80 kinetochore complex component                          |
| nas05673 | ZGLP1     | zinc finger, GATA-like protein 1                                    |
| nas24115 | GTF3C1    | general transcription factor IIIC subunit 1                         |
| nas07996 | SORT1     | sortilin 1                                                          |
| nas05172 | SLC34A1   | solute carrier family 34 member 1                                   |
| nas23488 | ASGR2     | asialoglycoprotein receptor 2                                       |
| nas00629 | GDF11     | growth differentiation factor 11                                    |
| nas20894 | ANGPTL4   | angiopoietin like 4                                                 |
| nas16473 | UTP6      | UTP6, small subunit processome component                            |
| nas15045 | NECAB3    | N-terminal EF-hand calcium binding protein 3                        |
| nas07102 | MATN1     | matrilin 1, cartilage matrix protein                                |
| nas00433 | EIF4ENIF1 | eukaryotic translation initiation factor 4E nuclear import factor 1 |
| nas13916 | TMEM107   | transmembrane protein 107                                           |
| nas14660 | NFIB      | nuclear factor I B                                                  |
| nas14079 | FOLR1     | folate receptor 1                                                   |
| nas15332 | ZYX       | zyxin                                                               |
| nas06625 | PRDX3     | peroxiredoxin 3                                                     |
| nas12695 | CHRNA3    | cholinergic receptor nicotinic gamma subunit                        |
| nas05791 | ZUFSP     | zinc finger with UFM1 specific peptidase domain                     |
| nas02353 | MTG2      | mitochondrial ribosome associated GTPase 2                          |
| nas20140 | ACHE      | acetylcholinesterase (Cartwright blood group)                       |
| nas05975 | TSPAN6    | tetraspanin 6                                                       |
| nas07005 | TMEM175   | transmembrane protein 175                                           |
| nas08391 | FIGLA     | folliculogenesis specific bHLH transcription factor                 |
| nas16061 | BSG       | basigin (Ok blood group)                                            |
| nas16675 | RSPH3     | radial spoke head 3 homolog                                         |
| nas04884 | SLC9A6    | solute carrier family 9 member A6                                   |
| nas13718 | TMEM82    | transmembrane protein 82                                            |
| nas19561 | MAN2C1    | mannosidase alpha class 2C member 1                                 |
| nas03250 | NPPA      | natriuretic peptide A                                               |
| nas16171 | APOA1     | apolipoprotein A1                                                   |
| nas01817 | ATP6V1H   | ATPase H+ transporting V1 subunit H                                 |
| nas10496 | C11orf70  | chromosome 11 open reading frame 70                                 |
| nas00941 | TMEM100   | transmembrane protein 100                                           |
| nas02506 | AQP4      | aquaporin 4                                                         |
| nas02782 | PTCD2     | pentatricopeptide repeat domain 2                                   |
| nas19809 | PIF1      | PIF1 5'-to-3' DNA helicase                                          |
| nas23909 | BLOC1S2   | biogenesis of lysosomal organelles complex 1 subunit 2              |
| nas17899 | DHRS11    | dehydrogenase/reductase 11                                          |

---

---

|          |          |                                                           |
|----------|----------|-----------------------------------------------------------|
| nas12814 | PLEKHS1  | pleckstrin homology domain containing S1                  |
| nas16651 | PACRG    | parkin coregulated                                        |
| nas10251 | HR       | HR, lysine demethylase and nuclear receptor corepressor   |
| nas23761 | MED31    | mediator complex subunit 31                               |
| nas22303 | MLANA    | melan-A                                                   |
| nas14420 | C1orf116 | chromosome 1 open reading frame 116                       |
| nas02169 | IRF2BPL  | interferon regulatory factor 2 binding protein like       |
| nas24032 | LRP3     | LDL receptor related protein 3                            |
| nas19115 | GNA11    | G protein subunit alpha 11                                |
| nas20985 | HDAC10   | histone deacetylase 10                                    |
| nas15372 | LEPROTL1 | leptin receptor overlapping transcript like 1             |
| nas17011 | PTGDR2   | prostaglandin D2 receptor 2                               |
| nas01425 | 10-Mar   | membrane associated ring-CH-type finger 10                |
| nas12118 | C2CD2    | C2 calcium dependent domain containing 2                  |
| nas24986 | SRD5A1   | steroid 5 alpha-reductase 1                               |
| nas11662 | SEMA4F   | ssemaphorin 4F                                            |
| nas14131 | TAF7L    | TATA-box binding protein associated factor 7 like         |
| nas07821 | SHANK1   | SH3 and multiple ankyrin repeat domains 1                 |
| nas12224 | SETDB2   | SET domain bifurcated 2                                   |
| nas03421 | ZFP69    | ZFP69 zinc finger protein                                 |
| nas22286 | NEK6     | NIMA related kinase 6                                     |
| nas16761 | KRT78    | keratin 78                                                |
| nas09226 | CTH      | cystathionine gamma-lyase                                 |
| nas10143 | GIMAP4   | GTPase, IMAP family member 4                              |
| nas02963 | CSN2     | casein beta                                               |
| nas09542 | SOAT1    | sterol O-acyltransferase 1                                |
| nas19918 | CABP4    | calcium binding protein 4                                 |
| nas15431 | ADAMTS18 | ADAM metallopeptidase with thrombospondin type 1 motif 18 |
| nas05505 | FAM151A  | family with sequence similarity 151 member A              |
| nas12372 | DNA2     | DNA replication helicase/nuclease 2                       |
| nas22425 | RTN3     | reticulon 3                                               |
| nas02123 | PARP9    | poly(ADP-ribose) polymerase family member 9               |
| nas18821 | EFR3A    | EFR3 homolog A                                            |
| nas02489 | USP26    | ubiquitin specific peptidase 26                           |
| nas08655 | LCLAT1   | lysocardiolipin acyltransferase 1                         |
| nas04869 | ZCCHC9   | zinc finger CCHC-type containing 9                        |
| nas06547 | C8orf33  | chromosome 8 open reading frame 33                        |
| nas13946 | PRR19    | proline rich 19                                           |
| nas18176 | PSCA     | prostate stem cell antigen                                |
| nas04830 | CEP85L   | centrosomal protein 85 like                               |
| nas15940 | C1D      | C1D nuclear receptor corepressor                          |
| nas23802 | ZBTB4    | zinc finger and BTB domain containing 4                   |
| nas05300 | SLC24A3  | solute carrier family 24 member 3                         |

---



---

|          |          |                                                             |
|----------|----------|-------------------------------------------------------------|
| nas22601 | C9orf84  | chromosome 9 open reading frame 84                          |
| nas03486 | CCDC158  | coiled-coil domain containing 158                           |
| nas19233 | CEL      | carboxyl ester lipase                                       |
| nas14309 | MSANTD1  | Myb/SANT DNA binding domain containing 1                    |
| nas07598 | IL21     | interleukin 21                                              |
| nas09693 | TOR1AIP2 | torsin 1A interacting protein 2                             |
| nas19633 | ISG20L2  | interferon stimulated exonuclease gene 20 like 2            |
| nas15507 | EPC2     | enhancer of polycomb homolog 2                              |
| nas04245 | CD8A     | CD8a molecule                                               |
| nas15934 | FYN      | FYN proto-oncogene, Src family tyrosine kinase              |
| nas06753 | RPS19BP1 | ribosomal protein S19 binding protein 1                     |
| nas02468 | IMPACT   | impact RWD domain protein                                   |
| nas02841 | GDF9     | growth differentiation factor 9                             |
| nas00012 | RB1CC1   | RB1 inducible coiled-coil 1                                 |
| nas13960 | IRGQ     | immunity related GTPase Q                                   |
| nas01117 | SOWAHB   | sosondawah ankyrin repeat domain family member B            |
| nas00300 | SYCN     | syncollin                                                   |
| nas06184 | LAMTOR3  | late endosomal/lysosomal adaptor, MAPK and MTOR activator 3 |
| nas00203 | TM4SF20  | transmembrane 4 L six family member 20                      |
| nas22837 | IFNAR1   | interferon alpha and beta receptor subunit 1                |
| nas13299 | HVCN1    | hydrogen voltage gated channel 1                            |
| nas22007 | MSX2     | msh homeobox 2                                              |
| nas17247 | TRIM45   | tripartite motif containing 45                              |
| nas20838 | TBXAS1   | thromboxane A synthase 1                                    |
| nas19492 | ICK      | intestinal cell kinase                                      |
| nas20939 | SAMM50   | SAMM50 sorting and assembly machinery component             |
| nas05944 | PSMG1    | proteasome assembly chaperone 1                             |
| nas04365 | ZNF830   | zinc finger protein 830                                     |
| nas08305 | SYTL1    | synaptotagmin like 1                                        |
| nas24189 | SETD1A   | SET domain containing 1A                                    |
| nas06006 | CXXC1    | CXXC finger protein 1                                       |
| nas05516 | TMEM61   | transmembrane protein 61                                    |
| nas16426 | CYTIP    | cytohesin 1 interacting protein                             |
| nas13193 | PLSCR4   | phospholipid scramblase 4                                   |
| nas03791 | TVP23A   | trans-golgi network vesicle protein 23 homolog A            |
| nas20412 | CTCFL    | CCCTC-binding factor like                                   |
| nas02042 | LRSAM1   | leucine rich repeat and sterile alpha motif containing 1    |
| nas13726 | CTRC     | chymotrypsin C                                              |
| nas20320 | HGFAC    | HGF activator                                               |
| nas22035 | APOD     | apolipoprotein D                                            |
| nas01537 | SAP30BP  | SAP30 binding protein                                       |
| nas20730 | COX4I1   | cytochrome c oxidase subunit 4I1                            |
| nas24417 | NCAPD2   | non-SMC condensin I complex subunit D2                      |

---

---

|          |          |                                                             |
|----------|----------|-------------------------------------------------------------|
| nas24415 | CHD4     | chromodomain helicase DNA binding protein 4                 |
| nas16067 | SHC2     | SHC adaptor protein 2                                       |
| nas16466 | RHOT1    | ras homolog family member T1                                |
| nas21769 | NA       | NA                                                          |
| nas16305 | RIC3     | RIC3 acetylcholine receptor chaperone                       |
| nas24229 | RITA1    | RBPJ interacting and tubulin associated 1                   |
| nas13836 | CASC3    | cancer susceptibility 3                                     |
| nas17630 | C1QTNF12 | C1q and TNF related 12                                      |
| nas17624 | INTS11   | integrator complex subunit 11                               |
| nas18562 | CFTR     | cystic fibrosis transmembrane conductance regulator         |
| nas07183 | TPRA1    | transmembrane protein adipocyte associated 1                |
| nas24879 | KAZN     | kazrin, periplakin interacting protein                      |
| nas19370 | TEX14    | testis expressed 14, intercellular bridge forming factor    |
| nas05071 | TEPSIN   | TEPSIN, adaptor related protein complex 4 accessory protein |
| nas15426 | CAGE1    | cancer antigen 1                                            |
| nas08634 | FADS1    | fatty acid desaturase 1                                     |

---

**Table S16. The classification of the candidate PSGs**

| <b>Gene ID</b> | <b>PATHER ID</b> | <b>description</b>                                                        |
|----------------|------------------|---------------------------------------------------------------------------|
| nas20645       | PTHR10489        | cell adhesion molecule                                                    |
| nas02916       | PTHR15004        | uncharacterized                                                           |
| nas23431       | PTHR19297        | glycosyltransferase 14 family member                                      |
| nas16008       | PTHR15454        | nischarin related                                                         |
| nas05569       | PTHR23097        | tumor necrosis factor receptor superfamily member                         |
| nas00047       | PTHR23053        | dlec1 deleted in lung and esophageal cancer 1                             |
| nas11931       | PTHR19325        | complement component-related sushi domain-containing                      |
| nas03498       | PTHR24242        | g-protein coupled receptor                                                |
| nas03109       | PTHR11610        | lipase                                                                    |
| nas07571       | PTHR22762        | alpha-glucosidase                                                         |
| nas00173       | PTHR24369        | family not named                                                          |
| nas08339       | PTHR10037        | voltage-gated cation channel calcium and sodium                           |
| nas16933       | PTHR24115        | family not named                                                          |
| nas11807       | PTHR10502        | annexin                                                                   |
| nas06894       | PTHR12919        | 30s ribosomal protein s16                                                 |
| nas06377       | PTHR13206        | ubiquitin ligase protein phf9 fanconi anemia group 1<br>protein           |
| nas12209       | PTHR14562        | family not named                                                          |
| nas01941       | PTHR12086        | ef-hand domain c-terminal containing protein                              |
| nas06520       | PTHR24257        | chymotrypsin-like elastase family member                                  |
| nas12470       | PTHR24031        | rna helicase                                                              |
| nas00446       | PTHR11132        | solute carrier family 35                                                  |
| nas25099       | PTHR24323        | family not named                                                          |
| nas14990       | PTHR23280        | 4.1 g protein                                                             |
| nas17486       | PTHR23113        | guanine nucleotide exchange factor                                        |
| nas12726       | PTHR14015        | opioid growth factor receptor ogfr zeta-type opioid<br>receptor           |
| nas23659       | PTHR12296        | c-myc promoter binding protein                                            |
| nas05407       | PTHR13113        | ecsit evolutionarily conserved signaling intermediate in<br>toll pathways |
| nas23555       | PTHR12231        | ctx-related type i transmembrane protein                                  |
| nas24488       | PTHR13043        | exocyst complex component sec5                                            |
| nas06483       | PTHR24375        | NA                                                                        |
| nas18892       | PTHR11199        | stromal antigen                                                           |
| nas04427       | PTHR10110        | sodium/hydrogen exchanger                                                 |
| nas14634       | PTHR18864        | kinectin                                                                  |
| nas11914       | PTHR24365        | toll-like receptor                                                        |
| nas09087       | PTHR10913        | follistatin-related                                                       |
| nas21102       | PTHR10728        | cytosolic phospholipase a2                                                |
| nas02847       | PTHR10078        | interleukin-1 family member                                               |
| nas10153       | PTHR15106        | family not named                                                          |

---

|          |           |                                                                        |
|----------|-----------|------------------------------------------------------------------------|
| nas14533 | PTHR32193 | family not named                                                       |
| nas21249 | PTHR24103 | trim/rbcc ring finger, b-box and coiled coil domains-containing        |
| nas21253 | PTHR12767 | bcl7 related                                                           |
| nas23250 | PTHR22761 | snf7 - related                                                         |
| nas06877 | PTHR23239 | intermediate filament                                                  |
| nas12651 | PTHR24243 | g-protein coupled receptor                                             |
| nas02770 | PTHR12172 | cell cycle checkpoint protein rad17                                    |
| nas14796 | PTHR11533 | protease m1 zinc metalloprotease                                       |
| nas21908 | PTHR24216 | family not named                                                       |
| nas17556 | PTHR11955 | fatty acid binding protein                                             |
| nas15084 | PTHR22572 | sugar-1-phosphate guanyl transferase                                   |
| nas17645 | PTHR12687 | nucleolar complex 2 and rad4-related                                   |
| nas17643 | PTHR22826 | rho guanine exchange factor-related                                    |
| nas08416 | PTHR23313 | tsec1-related                                                          |
| nas00929 | PTHR12670 | ceramidase                                                             |
| nas02338 | PTHR22574 | uncharacterized                                                        |
| nas23647 | PTHR11697 | general transcription factor 2-related zinc finger protein             |
| nas13737 | PTHR11654 | oligopeptide transporter-related                                       |
| nas09917 | PTHR12811 | vacuolar protein sorting vps16                                         |
| nas18950 | PTHR19134 | protein-tyrosine phosphatase                                           |
| nas18898 | PTHR11730 | ammonium transporter                                                   |
| nas16263 | PTHR10037 | voltage-gated cation channel calcium and sodium                        |
| nas23642 | PTHR43492 | family not named                                                       |
| nas01898 | PTHR10517 | folate receptor                                                        |
| nas23373 | PTHR11318 | guanylin family member                                                 |
| nas16726 | PTHR10686 | folate transporter                                                     |
| nas07560 | PTHR22923 | cerebellin-related                                                     |
| nas14162 | PTHR24102 | phd finger protein                                                     |
| nas17483 | PTHR11848 | tgf-beta family                                                        |
| nas13021 | PTHR13066 | basic leucine zipper nuclear factor 1 blzf1 protein                    |
| nas14440 | PTHR11005 | lysosomal acid lipase-related                                          |
| nas15025 | PTHR13259 | bladder cancer 10 kd protein homolog                                   |
| nas20965 | PTHR21584 | differential display and activated by p53 dda3 /g2 s phase expressed 1 |
| nas00787 | PTHR15712 | armadillo repeat containing protein                                    |
| nas02736 | PTHR11213 | glucagon-family neuropeptide                                           |
| nas08359 | PTHR11999 | group ii pyridoxal-5-phosphate decarboxylase                           |
| nas20041 | PTHR22923 | cerebellin-related                                                     |
| nas16311 | PTHR14330 | family not named                                                       |
| nas24631 | PTHR11267 | t-box protein-related                                                  |
| nas09814 | PTHR13199 | family not named                                                       |
| nas24863 | PTHR31548 | family not named                                                       |
| nas10471 | PTHR23333 | ubx domain containing protein                                          |

---

---

|          |           |                                                                                       |
|----------|-----------|---------------------------------------------------------------------------------------|
| nas04036 | PTHR10585 | er lumen protein retaining receptor                                                   |
| nas14981 | PTHR10749 | phosphorylase b kinase regulatory subunit                                             |
| nas00035 | PTHR12011 | g-protein coupled receptor                                                            |
| nas08813 | PTHR14134 | e3 ubiquitin-protein ligase rad18                                                     |
| nas22738 | PTHR12389 | zinc finger protein 294                                                               |
| nas13389 | PTHR13589 | transducer of regulated creb protein                                                  |
| nas03431 | PTHR11088 | trna delta 2 -isopentenylpyrophosphate transferase-related                            |
| nas12711 | PTHR43089 | family not named                                                                      |
| nas00078 | PTHR13448 | uncharacterized                                                                       |
| nas02273 | PTHR23231 | family not named                                                                      |
| nas16279 | PTHR19849 | phospholipase a-2-activating protein                                                  |
| nas06924 | PTHR19853 | wd repeat containing protein 3 wdr3                                                   |
| nas23980 | PTHR14885 | uncharacterized                                                                       |
| nas15028 | PTHR24418 | tyrosine-protein kinase                                                               |
| nas06412 | PTHR15749 | family not named                                                                      |
| nas17320 | PTHR22800 | c-type lectin proteins                                                                |
| nas00840 | PTHR11388 | organic anion transporter                                                             |
| nas24601 | PTHR15211 | glucose-dependent insulinotropic polypeptide                                          |
| nas05360 | PTHR22895 | uncharacterized                                                                       |
| nas24309 | PTHR11481 | immunoglobulin fc receptor                                                            |
| nas13752 | PTHR22826 | rho guanine exchange factor-related                                                   |
| nas13755 | PTHR11972 | nadph oxidase                                                                         |
| nas06526 | PTHR24124 | family not named                                                                      |
| nas01885 | PTHR19957 | syntaxin                                                                              |
| nas21060 | PTHR43205 | family not named                                                                      |
| nas24642 | PTHR11599 | proteasome subunit alpha/beta                                                         |
| nas25017 | PTHR35347 | family not named                                                                      |
| nas04180 | PTHR15129 | src-associated adaptor protein                                                        |
| nas13023 | PTHR24025 | family not named                                                                      |
| nas00497 | PTHR21663 | hypothetical heat domain-containing                                                   |
| nas00495 | PTHR11042 | eukaryotic translation initiation factor 2-alpha kinase<br>eif2-alpha kinase -related |
| nas21622 | PTHR18895 | methyltransferase                                                                     |
| nas17200 | PTHR12628 | polycomb-like transcription factor                                                    |
| nas24574 | PTHR11777 | alanyl-trna synthetase                                                                |
| nas15423 | PTHR12902 | wasp-1                                                                                |
| nas11540 | PTHR10344 | thymidylate kinase                                                                    |
| nas05284 | PTHR14069 | filensin                                                                              |
| nas07161 | PTHR10720 | heme oxygenase                                                                        |
| nas02501 | PTHR23107 | synovial sarcoma associated ss18 protein                                              |
| nas04387 | PTHR34523 | family not named                                                                      |
| nas03644 | PTHR10098 | rapsyn-related                                                                        |
| nas05211 | PTHR23050 | calcium binding protein                                                               |
| nas09873 | PTHR15215 | family not named                                                                      |

---

---

|          |           |                                                     |
|----------|-----------|-----------------------------------------------------|
| nas02725 | PTHR10533 | neuropeptide y/pancreatic hormone/peptide yy        |
| nas11758 | PTHR16770 | family not named                                    |
| nas08797 | PTHR15583 | interleukin-17 receptor                             |
| nas08790 | PTHR33668 | family not named                                    |
| nas05020 | PTHR11595 | elongation factor 1-beta                            |
| nas22824 | PTHR28675 | family not named                                    |
| nas11266 | PTHR23166 | filamin/gbp-interacting protein                     |
| nas17864 | PTHR21694 | uncharacterized                                     |
| nas17760 | PTHR10454 | caspase                                             |
| nas14017 | PTHR13196 | denn domain-containing                              |
| nas22183 | PTHR24240 | opsin                                               |
| nas13387 | PTHR42884 | family not named                                    |
| nas21340 | PTHR10707 | cytochrome c oxidase subunit iv                     |
| nas13635 | PTHR10802 | mitochondrial import receptor subunit tom40         |
| nas05854 | PTHR36869 | family not named                                    |
| nas23355 | PTHR33865 | family not named                                    |
| nas14724 | PTHR18945 | neurotransmitter gated ion channel                  |
| nas12913 | PTHR15197 | coilin p80                                          |
| nas22178 | PTHR13820 | synuclein                                           |
| nas04138 | PTHR10410 | eukaryotic translation initiation factor 3 -related |
| nas17850 | PTHR10934 | 60s ribosomal protein l18                           |
| nas13823 | PTHR24404 | zinc finger protein                                 |
| nas19386 | PTHR11636 | pou domain                                          |
| nas08114 | PTHR15414 | os-9-related                                        |
| nas21262 | PTHR12002 | claudin                                             |
| nas24907 | PTHR12458 | orf protein                                         |
| nas24604 | PTHR31915 | family not named                                    |
| nas22293 | PTHR19134 | protein-tyrosine phosphatase                        |
| nas11780 | PTHR24375 | NA                                                  |
| nas18336 | PTHR23308 | nuclear inhibitor of protein phosphatase-1          |
| nas15225 | PTHR31266 | family not named                                    |
| nas23493 | PTHR11771 | lipoxygenase                                        |
| nas18773 | PTHR12751 | phosphatase and actin regulator phactr              |
| nas07059 | PTHR10270 | sox transcription factor                            |
| nas22511 | PTHR21501 | uncharacterized                                     |
| nas12563 | PTHR36866 | family not named                                    |
| nas10397 | PTHR11616 | sodium/chloride dependent transporter               |
| nas22457 | PTHR24361 | mitogen-activated kinase                            |
| nas20120 | PTHR39221 | family not named                                    |
| nas22459 | PTHR22988 | myotonic dystrophy s/t kinase-related               |
| nas09242 | PTHR34645 | family not named                                    |
| nas10521 | PTHR11480 | saposin-related                                     |
| nas06033 | PTHR10768 | 60s ribosomal protein l37                           |
| nas21046 | PTHR10802 | mitochondrial import receptor subunit tom40         |

---

---

|          |           |                                                                    |
|----------|-----------|--------------------------------------------------------------------|
| nas00137 | PTHR11866 | prostaglandin receptor                                             |
| nas14104 | PTHR24103 | trim/rbcc ring finger, b-box and coiled coil<br>domains-containing |
| nas12278 | PTHR14407 | hermansky-pudlak syndrome 4 protein light-ear<br>protein-related   |
| nas00327 | PTHR32094 | family not named                                                   |
| nas21158 | PTHR14060 | family not named                                                   |
| nas05392 | PTHR22142 | uncharacterized                                                    |
| nas05673 | NA        | NA                                                                 |
| nas24115 | PTHR15180 | general transcription factor 3c polypeptide 1                      |
| nas07996 | PTHR12106 | sortilin related                                                   |
| nas05172 | PTHR10010 | solute carrier family 34 sodium phosphate member<br>2-related      |
| nas23488 | PTHR22802 | c-type lectin superfamily member                                   |
| nas00629 | PTHR11848 | tgf-beta family                                                    |
| nas20894 | PTHR19143 | fibrinogen/tenascin/angiopoietin                                   |
| nas16473 | PTHR23271 | hepatocellular carcinoma-associated antigen 66                     |
| nas15045 | PTHR12178 | family not named                                                   |
| nas07102 | PTHR11132 | solute carrier family 35                                           |
| nas00433 | PTHR12269 | eukaryotic translation initiation factor 4e transporter            |
| nas13916 | PTHR34341 | family not named                                                   |
| nas14660 | PTHR11492 | nuclear factor i                                                   |
| nas14079 | PTHR10517 | folate receptor                                                    |
| nas15332 | PTHR24212 | family not named                                                   |
| nas06625 | PTHR10681 | thioredoxin peroxidase                                             |
| nas12695 | PTHR18945 | neurotransmitter gated ion channel                                 |
| nas05791 | PTHR24375 | NA                                                                 |
| nas02353 | PTHR11702 | developmentally regulated gtp-binding protein-related              |
| nas20140 | PTHR11559 | carboxylesterase                                                   |
| nas05975 | PTHR19282 | tetraspanin                                                        |
| nas07005 | PTHR31462 | family not named                                                   |
| nas08391 | PTHR23349 | basic helix-loop-helix transcription factor, twist                 |
| nas16061 | PTHR10075 | basigin related                                                    |
| nas16675 | PTHR21648 | flagellar radial spoke protein 3                                   |
| nas04884 | PTHR10110 | sodium/hydrogen exchanger                                          |
| nas13718 | PTHR35257 | family not named                                                   |
| nas19561 | PTHR11607 | alpha-mannosidase                                                  |
| nas03250 | PTHR14066 | atrial natriuretic factor precursor                                |
| nas16171 | PTHR18976 | apolipoprotein                                                     |
| nas01817 | PTHR10698 | v-type proton atpase subunit h                                     |
| nas10496 | PTHR31078 | family not named                                                   |
| nas00941 | PTHR16100 | family not named                                                   |
| nas02506 | PTHR19139 | aquaporin transporter                                              |
| nas02782 | PTHR14700 | family not named                                                   |

---

---

|          |           |                                                                                 |
|----------|-----------|---------------------------------------------------------------------------------|
| nas19809 | PTHR23274 | dna helicase-related                                                            |
| nas23909 | PTHR10668 | phytoene dehydrogenase                                                          |
| nas17899 | PTHR43115 | family not named                                                                |
| nas12814 | PTHR12156 | grb2-associated binder, gab                                                     |
| nas16651 | PTHR21207 | parkin coregulated gene protein park2 coregulated                               |
| nas10251 | PTHR12549 | jmjc domain-containing histone demethylation protein                            |
| nas23761 | PTHR13186 | mediator of rna polymerase ii transcription subunit soh1                        |
| nas22303 | PTHR15305 | family not named                                                                |
| nas14420 | PTHR21555 | family not named                                                                |
| nas02169 | PTHR10816 | myelin transcription factor 1-related                                           |
| nas24032 | PTHR10529 | low-density lipoprotein receptor-related                                        |
| nas19115 | PTHR10218 | gtp-binding protein alpha subunit                                               |
| nas20985 | PTHR10625 | histone deacetylase                                                             |
| nas15372 | PTHR12050 | leptin receptor-related                                                         |
| nas17011 | PTHR24229 | neuropeptides receptor                                                          |
| nas01425 | PTHR14471 | e3 ubiquitin-protein ligase march7, 10                                          |
| nas12118 | PTHR21119 | uncharacterized                                                                 |
| nas24986 | PTHR10556 | 3-oxo-5-alpha-steroid 4-dehydrogenase                                           |
| nas11662 | PTHR11036 | semaphorin                                                                      |
| nas14131 | PTHR12228 | transcription initiation factor tfiid 55 kd subunit-related                     |
| nas07821 | PTHR24135 | family not named                                                                |
| nas12224 | PTHR22884 | set domain proteins                                                             |
| nas03421 | PTHR24381 | family not named                                                                |
| nas22286 | PTHR43289 | family not named                                                                |
| nas16761 | PTHR23239 | intermediate filament                                                           |
| nas09226 | PTHR11808 | trans-sulfuration enzyme family member                                          |
| nas10143 | PTHR10903 | gtpase, imap family member-related                                              |
| nas02963 | PTHR11500 | beta casein                                                                     |
| nas09542 | PTHR10408 | sterol o-acyltransferase                                                        |
| nas19918 | PTHR23050 | calcium binding protein                                                         |
| nas15431 | PTHR13723 | adamts a disintegrin and metalloprotease with<br>thrombospondin motifs protease |
| nas05505 | PTHR21184 | family not named                                                                |
| nas12372 | PTHR10887 | dna2/nam7 helicase family                                                       |
| nas22425 | PTHR10994 | reticulon                                                                       |
| nas02123 | PTHR14453 | parp/zinc finger ccch type domain containing protein                            |
| nas18821 | PTHR12444 | uncharacterized                                                                 |
| nas02489 | PTHR24006 | family not named                                                                |
| nas08655 | PTHR10983 | 1-acylglycerol-3-phosphate acyltransferase-related                              |
| nas04869 | PTHR23002 | zinc finger cchc domain containing protein                                      |
| nas06547 | PTHR13602 | uncharacterized                                                                 |
| nas13946 | PTHR37346 | family not named                                                                |
| nas18176 | PTHR16983 | family not named                                                                |
| nas04830 | PTHR31075 | family not named                                                                |

---



---

|          |           |                                                                                 |
|----------|-----------|---------------------------------------------------------------------------------|
| nas15940 | PTHR15341 | sun-cor steroid hormone receptor co-repressor                                   |
| nas23802 | PTHR19303 | transposon                                                                      |
| nas05300 | PTHR10846 | sodium/potassium/calcium exchanger                                              |
| nas22601 | PTHR35668 | family not named                                                                |
| nas03486 | PTHR13140 | myosin                                                                          |
| nas19233 | PTHR11559 | carboxylesterase                                                                |
| nas14309 | PTHR22666 | uncharacterized                                                                 |
| nas07598 | PTHR14356 | family not named                                                                |
| nas09693 | PTHR18843 | torsin-1a-interacting protein                                                   |
| nas19633 | PTHR12801 | exonuclease                                                                     |
| nas15507 | PTHR14898 | enhancer of polycomb                                                            |
| nas04245 | PTHR10441 | cd8 alpha chain                                                                 |
| nas15934 | PTHR24418 | tyrosine-protein kinase                                                         |
| nas06753 | PTHR31454 | family not named                                                                |
| nas02468 | PTHR16301 | impact-related                                                                  |
| nas02841 | PTHR11848 | tgf-beta family                                                                 |
| nas00012 | PTHR13222 | cgthba protein -14 gene protein                                                 |
| nas13960 | PTHR19364 | family not named                                                                |
| nas01117 | PTHR14491 | uncharacterized                                                                 |
| nas00300 | PTHR17503 | family not named                                                                |
| nas06184 | PTHR13378 | regulator complex protein lamtor3                                               |
| nas00203 | PTHR14198 | family not named                                                                |
| nas22837 | PTHR20859 | interferon/interleukin receptor                                                 |
| nas13299 | PTHR12305 | phosphatase with homology to tensin                                             |
| nas22007 | PTHR24338 | family not named                                                                |
| nas17247 | PTHR24103 | trim/rbcc ring finger, b-box and coiled coil<br>domains-containing              |
| nas20838 | PTHR24301 | family not named                                                                |
| nas19492 | PTHR24055 | mitogen-activated protein kinase                                                |
| nas20939 | PTHR12815 | sorting and assembly machinery sam50 protein                                    |
| nas05944 | PTHR15069 | family not named                                                                |
| nas04365 | PTHR13278 | uncharacterized                                                                 |
| nas08305 | PTHR10024 | synaptotagmin                                                                   |
| nas24189 | PTHR22884 | set domain proteins                                                             |
| nas06006 | PTHR12321 | cpg binding protein                                                             |
| nas05516 | PTHR37151 | family not named                                                                |
| nas16426 | PTHR15963 | general receptor for phosphoinositides 1-associated<br>scaffold protein-related |
| nas13193 | PTHR23248 | phospholipid scramblase-related                                                 |
| nas03791 | PTHR13019 | uncharacterized                                                                 |
| nas20412 | PTHR24375 | NA                                                                              |
| nas02042 | PTHR23155 | leucine-rich repeat-containing protein                                          |
| nas13726 | PTHR24250 | family not named                                                                |
| nas20320 | PTHR24256 | transmembrane protease, serine                                                  |

---

---

|          |           |                                                                                               |
|----------|-----------|-----------------------------------------------------------------------------------------------|
| nas22035 | PTHR12398 | protein phosphatase inhibitor                                                                 |
| nas01537 | PTHR13464 | transcriptional regulator protein hcngp                                                       |
| nas20730 | PTHR10707 | cytochrome c oxidase subunit iv                                                               |
| nas24417 | PTHR14222 | condensin                                                                                     |
| nas24415 | PTHR10799 | swi/snf-related matrix-associated actin-dependent<br>regulator of chromatin subfamily-related |
| nas16067 | PTHR10337 | shc transforming protein                                                                      |
| nas16466 | PTHR24072 | rho family gtpase                                                                             |
| nas21769 | PTHR22765 | ring finger and protease associated domain-containing                                         |
| nas16305 | PTHR21723 | resistance to inhibitors of cholinesterase protein 3 ric3                                     |
| nas24229 | PTHR34917 | family not named                                                                              |
| nas13836 | PTHR13434 | family not named                                                                              |
| nas17630 | PTHR24019 | family not named                                                                              |
| nas17624 | PTHR11203 | cleavage and polyadenylation specificity factor                                               |
| nas18562 | PTHR24223 | family not named                                                                              |
| nas07183 | PTHR15876 | transmembrane protein adipocyte-associated 1                                                  |
| nas24879 | PTHR12776 | kazrin-related                                                                                |
| nas19370 | PTHR23060 | testis expressed gene 14                                                                      |
| nas05071 | PTHR21514 | uncharacterized                                                                               |
| nas15426 | PTHR36864 | family not named                                                                              |
| nas08634 | PTHR19353 | fatty acid desaturase 2                                                                       |

---

**Table S16. GO categories showing accelerated evolutionary rates in the Yangtze finless porpoise lineage and the other cetaceans**

| GO         | Type               | Function                                                    | Adjust P-value |
|------------|--------------------|-------------------------------------------------------------|----------------|
| GO:0007601 | biological process | visual perception                                           | 0.024435712    |
| GO:0016192 | biological process | vesicle-mediated transport                                  | 5.55E-11       |
| GO:0006511 | biological process | ubiquitin-dependent protein catabolic process               | 0.020800796    |
| GO:0006810 | biological process | transport                                                   | 8.07E-34       |
| GO:0055085 | biological process | transmembrane transport                                     | 2.42E-08       |
| GO:0044281 | biological process | small molecule metabolic process                            | 1.16E-13       |
| GO:0007165 | biological process | signal transduction                                         | 5.87E-31       |
| GO:0032774 | biological process | RNA biosynthetic process                                    | 0.018415765    |
| GO:0009259 | biological process | ribonucleotide metabolic process                            | 8.91E-05       |
| GO:0009611 | biological process | response to wounding                                        | 2.04E-05       |
| GO:0050896 | biological process | response to stimulus                                        | 6.53E-36       |
| GO:0009605 | biological process | response to external stimulus                               | 0.030767796    |
| GO:0042221 | biological process | response to chemical                                        | 6.26E-15       |
| GO:0022414 | biological process | reproductive process                                        | 3.27E-05       |
| GO:0006357 | biological process | regulation of transcription from RNA polymerase II promoter | 5.30E-11       |
| GO:0080134 | biological process | regulation of response to stress                            | 2.07E-11       |
| GO:0048583 | biological process | regulation of response to stimulus                          | 3.09E-16       |
| GO:0043067 | biological process | regulation of programmed cell death                         | 0.001688394    |
| GO:0051239 | biological process | regulation of multicellular organismal process              | 0.000215502    |
| GO:0002682 | biological process | regulation of immune system process                         | 0.002036577    |
| GO:0050776 | biological process | regulation of immune response                               | 0.009061234    |
| GO:0050794 | biological process | regulation of cellular process                              | 5.53E-70       |
| GO:0051128 | biological process | regulation of cellular component organization               | 1.70E-12       |
| GO:0031329 | biological process | regulation of cellular catabolic process                    | 4.00E-10       |
| GO:0010941 | biological process | regulation of cell death                                    | 0.001688394    |
| GO:0009894 | biological process | regulation of catabolic process                             | 3.07E-11       |
| GO:0065008 | biological process | regulation of biological quality                            | 4.32E-05       |
| GO:0050789 | biological process | regulation of biological process                            | 2.42E-68       |
| GO:0042981 | biological process | regulation of apoptotic process                             | 0.001688394    |
| GO:0072521 | biological process | purine-containing compound metabolic process                | 9.93E-07       |
| GO:0072522 | biological process | purine-containing compound biosynthetic process             | 2.35E-06       |
| GO:0006163 | biological process | purine nucleotide metabolic process                         | 1.73E-05       |
| GO:0006164 | biological process | purine nucleotide biosynthetic process                      | 2.18E-06       |
| GO:0006508 | biological process | proteolysis                                                 | 6.73E-06       |
| GO:0016567 | biological process | protein ubiquitination                                      | 1.46E-07       |
| GO:0015031 | biological process | protein transport                                           | 1.23E-07       |
| GO:0006468 | biological process | protein phosphorylation                                     | 1.71E-09       |
| GO:0036211 | biological process | protein modification process                                | 8.53E-17       |

---

|            |                    |                                                        |             |
|------------|--------------------|--------------------------------------------------------|-------------|
| GO:0070646 | biological process | protein modification by small protein removal          | 0.010334405 |
| GO:0019538 | biological process | protein metabolic process                              | 4.64E-23    |
| GO:0016579 | biological process | protein deubiquitination                               | 0.010334405 |
| GO:0012501 | biological process | programmed cell death                                  | 0.007746723 |
| GO:0044238 | biological process | primary metabolic process                              | 4.41E-48    |
| GO:0006813 | biological process | potassium ion transport                                | 0.007305762 |
| GO:0048584 | biological process | positive regulation of response to stimulus            | 1.50E-07    |
| GO:0044093 | biological process | positive regulation of molecular function              | 0.020354587 |
| GO:0048522 | biological process | positive regulation of cellular process                | 3.36E-11    |
| GO:0048518 | biological process | positive regulation of biological process              | 1.34E-11    |
| GO:0016310 | biological process | phosphorylation                                        | 6.55E-10    |
| GO:0006793 | biological process | phosphorus metabolic process                           | 9.70E-19    |
| GO:0006796 | biological process | phosphate-containing compound metabolic process        | 9.70E-19    |
| GO:0016265 | biological process | obsolete death                                         | 0.006437149 |
| GO:0006397 | biological process | mRNA processing                                        | 0.033147262 |
| GO:0016071 | biological process | mRNA metabolic process                                 | 0.012241772 |
| GO:0005996 | biological process | monosaccharide metabolic process                       | 0.008865569 |
| GO:0019941 | biological process | modification-dependent protein catabolic process       | 0.020800796 |
| GO:0043632 | biological process | modification-dependent macromolecule catabolic process | 0.020800796 |
| GO:0008152 | biological process | metabolic process                                      | 2.12E-59    |
| GO:0043412 | biological process | macromolecule modification                             | 5.12E-15    |
| GO:0043170 | biological process | macromolecule metabolic process                        | 1.65E-35    |
| GO:0006629 | biological process | lipid metabolic process                                | 8.49E-06    |
| GO:0006811 | biological process | ion transport                                          | 6.80E-13    |
| GO:0035556 | biological process | intracellular signal transduction                      | 3.04E-13    |
| GO:0006954 | biological process | inflammatory response                                  | 2.04E-05    |
| GO:0002376 | biological process | immune system process                                  | 0.011212838 |
| GO:0006955 | biological process | immune response                                        | 0.017093438 |
| GO:0019318 | biological process | hexose metabolic process                               | 0.014826858 |
| GO:0046483 | biological process | heterocycle metabolic process                          | 1.66E-21    |
| GO:0007186 | biological process | G-protein coupled receptor signaling pathway           | 0.009504177 |
| GO:0045184 | biological process | establishment of protein localization                  | 1.23E-07    |
| GO:0051234 | biological process | establishment of localization                          | 2.35E-34    |
| GO:0006281 | biological process | DNA repair                                             | 7.74E-15    |
| GO:0016311 | biological process | dephosphorylation                                      | 3.22E-11    |
| GO:0006952 | biological process | defense response                                       | 4.76E-06    |
| GO:0006325 | biological process | chromatin organization                                 | 1.33E-13    |
| GO:0016568 | biological process | chromatin modification                                 | 1.27E-08    |
| GO:0051716 | biological process | cellular response to stimulus                          | 6.50E-40    |
| GO:0006464 | biological process | cellular protein modification process                  | 8.53E-17    |
| GO:0044267 | biological process | cellular protein metabolic process                     | 1.77E-14    |

---

---

|            |                    |                                                                             |             |
|------------|--------------------|-----------------------------------------------------------------------------|-------------|
| GO:0009987 | biological process | cellular process                                                            | 5.66E-83    |
| GO:0044237 | biological process | cellular metabolic process                                                  | 3.65E-40    |
| GO:0044260 | biological process | cellular macromolecule metabolic process                                    | 8.72E-28    |
| GO:0044248 | biological process | cellular catabolic process                                                  | 0.004677883 |
| GO:0007166 | biological process | cell surface receptor signaling pathway                                     | 5.22E-10    |
| GO:0008219 | biological process | cell death                                                                  | 0.006437149 |
| GO:0007155 | biological process | cell adhesion                                                               | 0.000276555 |
| GO:0006812 | biological process | cation transport                                                            | 8.13E-08    |
| GO:0009056 | biological process | catabolic process                                                           | 2.37E-05    |
| GO:0008150 | biological process | biological process                                                          | 1.32E-144   |
| GO:0065007 | biological process | biological regulation                                                       | 1.86E-71    |
| GO:0022610 | biological process | biological adhesion                                                         | 0.000276555 |
| GO:0006915 | biological process | apoptotic process                                                           | 0.007746723 |
| GO:0044459 | cellular component | plasma membrane part                                                        | 8.33E-07    |
| GO:0044422 | cellular component | organelle part                                                              | 1.60E-19    |
| GO:0044451 | cellular component | nucleoplasm part                                                            | 0.000532619 |
| GO:0044428 | cellular component | nuclear part                                                                | 4.10E-14    |
| GO:0005739 | cellular component | mitochondrion                                                               | 0.034598683 |
| GO:0044425 | cellular component | membrane part                                                               | 6.62E-24    |
| GO:0016020 | cellular component | membrane                                                                    | 5.95E-21    |
| GO:0031224 | cellular component | intrinsic component of membrane                                             | 7.73E-15    |
| GO:0044446 | cellular component | intracellular organelle part                                                | 5.76E-20    |
| GO:0016021 | cellular component | integral component of membrane                                              | 1.11E-14    |
| GO:0005737 | cellular component | cytoplasm                                                                   | 1.07E-14    |
| GO:0044427 | cellular component | chromosomal part                                                            | 0.007851605 |
| GO:0005575 | cellular component | cellular component                                                          | 4.78E-89    |
| GO:0044464 | cellular component | cell part                                                                   | 1.04E-64    |
| GO:0019842 | molecular function | vitamin binding                                                             | 0.034019828 |
| GO:0005215 | molecular function | transporter activity                                                        | 2.23E-19    |
| GO:0022857 | molecular function | transmembrane transporter activity                                          | 2.11E-12    |
| GO:0004888 | molecular function | transmembrane signaling receptor activity                                   | 6.15E-14    |
| GO:0016772 | molecular function | transferase activity, transferring phosphorus-containing groups             | 1.05E-14    |
| GO:0016741 | molecular function | transferase activity, transferring one-carbon groups                        | 2.47E-08    |
| GO:0016758 | molecular function | transferase activity, transferring hexosyl groups                           | 1.07E-08    |
| GO:0016757 | molecular function | transferase activity, transferring glycosyl groups                          | 0.000543779 |
| GO:0016747 | molecular function | transferase activity, transferring acyl groups other than amino-acyl groups | 0.001729132 |
| GO:0016746 | molecular function | transferase activity, transferring acyl groups                              | 0.005602143 |
| GO:0000989 | molecular function | transcription factor activity, transcription factor binding                 | 1.24E-06    |
| GO:0000988 | molecular function | transcription factor activity, protein binding                              | 1.24E-06    |
| GO:0003712 | molecular function | transcription cofactor activity                                             | 1.75E-06    |

---

---

|            |                    |                                                           |             |
|------------|--------------------|-----------------------------------------------------------|-------------|
| GO:0036459 | molecular function | thiol-dependent ubiquitinyl hydrolase activity            | 1.02E-07    |
| GO:0022892 | molecular function | substrate-specific transporter activity                   | 4.38E-16    |
| GO:0022891 | molecular function | substrate-specific transmembrane transporter activity     | 9.05E-13    |
| GO:0022838 | molecular function | substrate-specific channel activity                       | 4.72E-05    |
| GO:0036094 | molecular function | small molecule binding                                    | 1.42E-28    |
| GO:0038023 | molecular function | signaling receptor activity                               | 8.55E-16    |
| GO:0004871 | molecular function | signal transducer activity                                | 1.15E-13    |
| GO:0015291 | molecular function | secondary active transmembrane transporter activity       | 0.012645954 |
| GO:0008757 | molecular function | S-adenosylmethionine-dependent methyltransferase activity | 0.011391172 |
| GO:0032553 | molecular function | ribonucleotide binding                                    | 2.21E-25    |
| GO:0004872 | molecular function | receptor activity                                         | 2.10E-17    |
| GO:0016462 | molecular function | pyrophosphatase activity                                  | 1.75E-12    |
| GO:0032555 | molecular function | purine ribonucleotide binding                             | 2.21E-25    |
| GO:0035639 | molecular function | purine ribonucleoside triphosphate binding                | 1.30E-25    |
| GO:0017076 | molecular function | purine nucleotide binding                                 | 2.21E-25    |
| GO:0004725 | molecular function | protein tyrosine phosphatase activity                     | 8.22E-11    |
| GO:0004713 | molecular function | protein tyrosine kinase activity                          | 0.035618962 |
| GO:0004674 | molecular function | protein serine/threonine kinase activity                  | 0.000127064 |
| GO:0004672 | molecular function | protein kinase activity                                   | 1.62E-11    |
| GO:0005515 | molecular function | protein binding                                           | 2.84E-96    |
| GO:0015079 | molecular function | potassium ion transmembrane transporter activity          | 0.000836259 |
| GO:0016773 | molecular function | phosphotransferase activity, alcohol group as acceptor    | 4.06E-13    |
| GO:0042578 | molecular function | phosphoric ester hydrolase activity                       | 1.40E-15    |
| GO:0008081 | molecular function | phosphoric diester hydrolase activity                     | 5.62E-05    |
| GO:0004721 | molecular function | phosphoprotein phosphatase activity                       | 1.78E-10    |
| GO:0070011 | molecular function | peptidase activity, acting on L-amino acid peptides       | 9.50E-13    |
| GO:0008233 | molecular function | peptidase activity                                        | 1.33E-11    |
| GO:0022803 | molecular function | passive transmembrane transporter activity                | 4.72E-05    |
| GO:0016491 | molecular function | oxidoreductase activity                                   | 0.001291082 |
| GO:0097159 | molecular function | organic cyclic compound binding                           | 8.49E-99    |
| GO:0016779 | molecular function | nucleotid yltransferase activity                          | 0.000464637 |
| GO:0000166 | molecular function | nucleotide binding                                        | 6.00E-28    |
| GO:0017111 | molecular function | nucleoside-triphosphatase activity                        | 8.09E-12    |
| GO:1901265 | molecular function | nucleoside phosphate binding                              | 6.00E-28    |
| GO:0004518 | molecular function | nuclease activity                                         | 0.00545605  |
| GO:0003774 | molecular function | motor activity                                            | 0.00169836  |
| GO:0003674 | molecular function | molecular function                                        | 1.76E-224   |
| GO:0060089 | molecular function | molecular transducer activity                             | 1.15E-13    |

---

---

|            |                    |                                                                                    |             |
|------------|--------------------|------------------------------------------------------------------------------------|-------------|
| GO:0008168 | molecular function | methyltransferase activity                                                         | 0.000172775 |
| GO:0046873 | molecular function | metal ion transmembrane transporter activity                                       | 8.55E-05    |
| GO:0016874 | molecular function | ligase activity                                                                    | 4.30E-05    |
| GO:0016301 | molecular function | kinase activity                                                                    | 4.02E-13    |
| GO:0015075 | molecular function | ion transmembrane transporter activity                                             | 2.15E-07    |
| GO:0005216 | molecular function | ion channel activity                                                               | 4.72E-05    |
| GO:0022890 | molecular function | inorganic cation transmembrane transporter activity                                | 0.000242794 |
| GO:0004553 | molecular function | hydrolase activity, hydrolyzing O-glycosyl compounds                               | 0.000212222 |
| GO:0016818 | molecular function | hydrolase activity, acting on acid anhydrides, in phosphorus-containing anhydrides | 1.12E-12    |
| GO:0016817 | molecular function | hydrolase activity, acting on acid anhydrides                                      | 1.66E-12    |
| GO:0016787 | molecular function | hydrolase activity                                                                 | 1.37E-44    |
| GO:1901363 | molecular function | heterocyclic compound binding                                                      | 8.49E-99    |
| GO:0032561 | molecular function | guanyl ribonucleotide binding                                                      | 0.004941736 |
| GO:0019001 | molecular function | guanyl nucleotide binding                                                          | 0.004941736 |
| GO:0003924 | molecular function | GTPase activity                                                                    | 0.001861745 |
| GO:0005525 | molecular function | GTP binding                                                                        | 0.012900568 |
| GO:0004930 | molecular function | G-protein coupled receptor activity                                                | 0.02060625  |
| GO:0004175 | molecular function | endopeptidase activity                                                             | 3.73E-07    |
| GO:0003677 | molecular function | DNA binding                                                                        | 4.54E-45    |
| GO:0015267 | molecular function | channel activity                                                                   | 4.72E-05    |
| GO:0008324 | molecular function | cation transmembrane transporter activity                                          | 0.000297471 |
| GO:0005261 | molecular function | cation channel activity                                                            | 0.001401391 |
| GO:0003824 | molecular function | catalytic activity                                                                 | 1.79E-73    |
| GO:0005488 | molecular function | binding                                                                            | 7.30E-190   |
| GO:0016887 | molecular function | ATPase activity                                                                    | 0.000290959 |
| GO:0005524 | molecular function | ATP binding                                                                        | 2.11E-24    |
| GO:0032559 | molecular function | adenyl ribonucleotide binding                                                      | 7.93E-24    |
| GO:0030554 | molecular function | adenyl nucleotide binding                                                          | 7.93E-24    |
| GO:0022804 | molecular function | active transmembrane transporter activity                                          | 0.015954346 |
| GO:0003779 | molecular function | actin binding                                                                      | 1.63E-06    |

---

**Table S17. Distribution of SNVs in the Yangtze finless porpoise genome**

| <b>Type (alphabetical order)</b> | <b>Count</b>     | <b>Percent</b> |
|----------------------------------|------------------|----------------|
| 5_prime_UTR_variant              | 1                | 0%             |
| Downstream gene variant          | 112,290          | 4.45%          |
| Intergenic                       | 1,623,467        | 64.27%         |
| Introns                          | 649,368          | 25.71%         |
| Missense variant                 | 12,227           | 0.48%          |
| Splice acceptor variant          | 80               | 0.00%          |
| Splice donor variant             | 104              | 0.00%          |
| Splice region variant            | 1,976            | 0.08%          |
| Start lost                       | 72               | 0.00%          |
| Stop gained                      | 201              | 0.01%          |
| Stop lost                        | 55               | 0.00%          |
| Stop retained variant            | 9                | 0%             |
| Synonymous variant               | 11,036           | 0.44%          |
| Upstream gene variant            | 115,285          | 4.56%          |
| <b>Total</b>                     | <b>2,526,171</b> | <b>100%</b>    |



**Table S18. The distribution of InDels in the Yangtze finless porpoise genome**

| <b>Location</b>         | <b>Count</b>   |
|-------------------------|----------------|
| Intergenic              | 198,514        |
| Upstream gene variant   | 14,690         |
| Downstream gene variant | 13,096         |
| Intron                  | 93,549         |
| Exonic                  |                |
| Frameshift              | 430            |
| Inframe                 | 139            |
| <b>Total</b>            | <b>320,821</b> |
